# Supplementary material for: MicroRNA-17 and the prognosis of human carcinomas: a systematic review and meta-analysis
Source: PubMed Central journal article supplement — BMJ Open. 2018 May 31;8(5):e018070. doi: 10.1136/bmjopen-2017-018070 (PMC5988052; doi:10.1136/bmjopen-2017-018070), 2018-05-31
Supplement: bmjopen-2017-018070supp001.pdf [file bmjopen-2017-018070supp001.pdf]

**Supplementary Table 1 The search strategy of online databases**

| <b>Databases</b> | <b>Search method</b>                                                                           |
|------------------|------------------------------------------------------------------------------------------------|
| Pubmed           | ("MIRN17 microRNA, human" [Supplementary Concept] AND "Neoplasms"[Mesh] AND "Prognosis"[Mesh]) |
| Web of Science   |                                                                                                |
| 1                | TS=(cancer OR neoplas* OR carcinom* OR tumo*)                                                  |
| 2                | TS=(prognosis OR prognostic OR survival OR outcome OR mortality)                               |
| 3                | TS=(miR-17 OR microRNA-17 OR hsa-mir-17)                                                       |
| 4                | #1 AND #2 AND #3                                                                               |
| Embase           |                                                                                                |
| 1                | miR-17 OR microRNA-17 OR hsa-mir-17                                                            |
| 2                | cancer OR neoplas* OR carcinom* OR tumo*                                                       |
| 3                | prognosis OR prognostic OR survival OR outcome OR mortality                                    |
| 4                | #1 AND #2 AND #3 AND ([embase]/lim AND 'human'/de)                                             |
