# Supplementary figures and images for: MicroRNA-17 and the prognosis of human carcinomas: a systematic review and meta-analysis
Source: PubMed Central journal article supplement — BMJ Open. 2018 May 31;8(5):e018070. doi: 10.1136/bmjopen-2017-018070 (PMC5988052; doi:10.1136/bmjopen-2017-018070), 2018-05-31

Filled funnel plot with pseudo 95% confidence limits

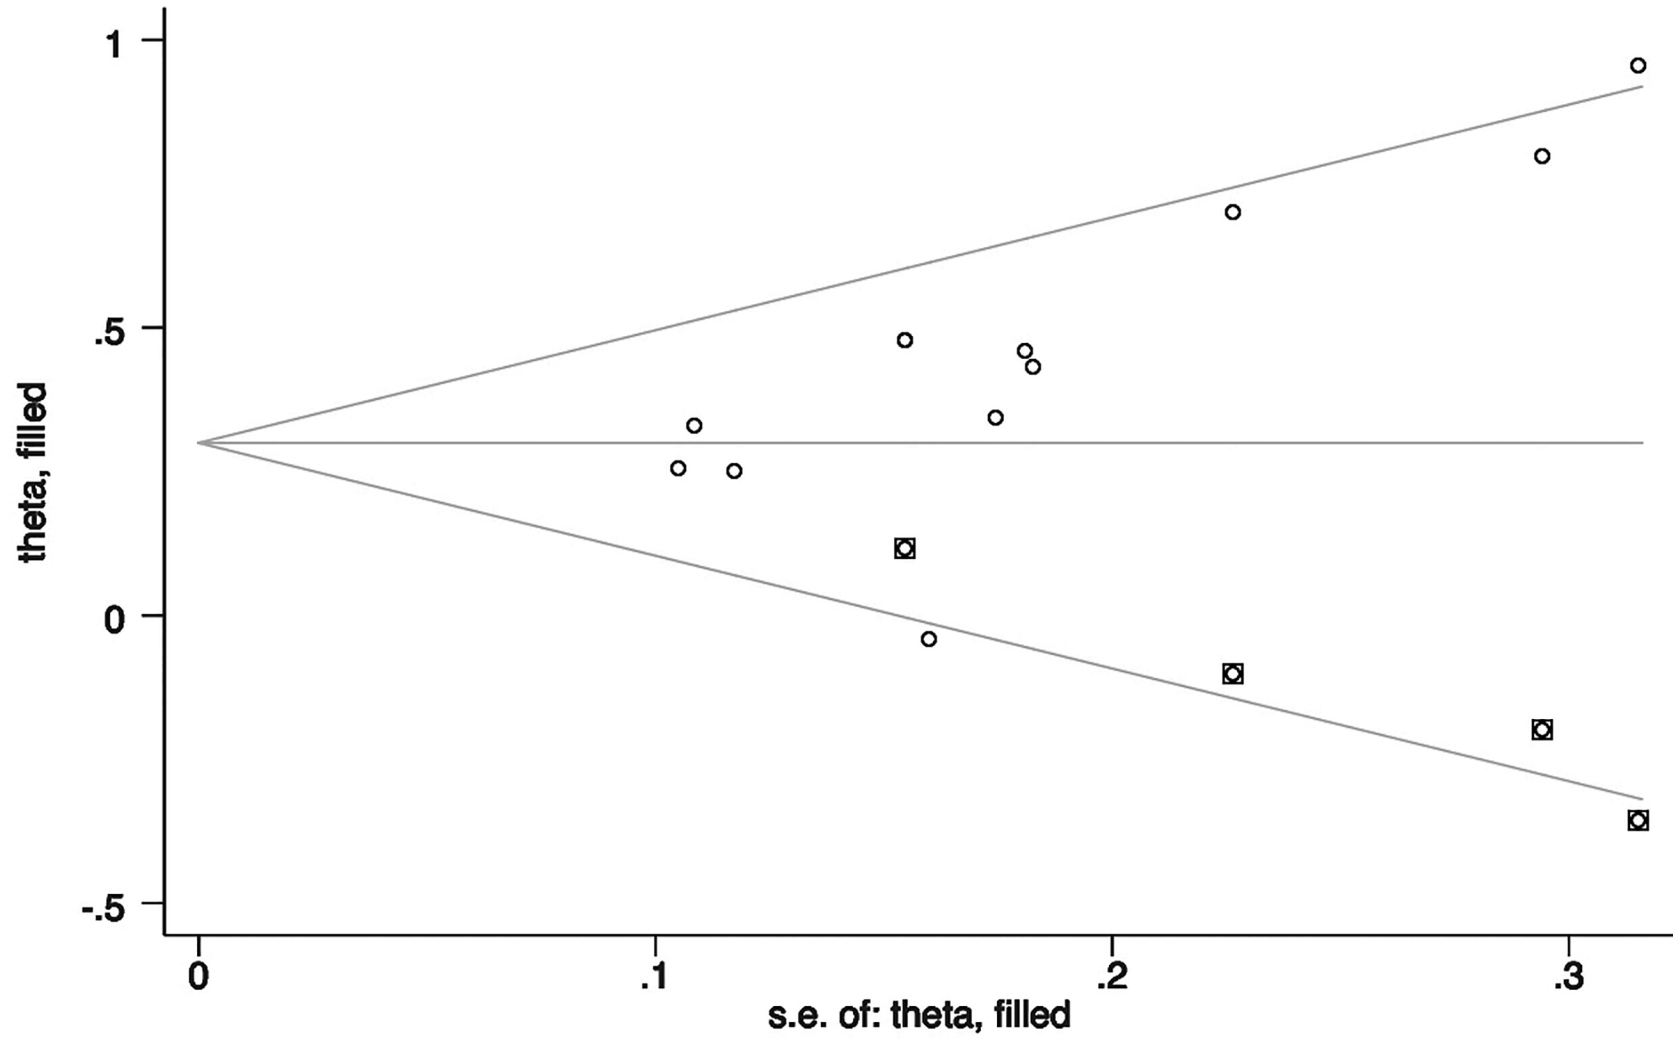

Supplement: bmjopen-2017-018070supp002.pdf [file bmjopen-2017-018070supp002.pdf]
